# Supplementary material
Source: publisher figshare collection journal article supplement (https://asha.figshare.com/articles/dataset/_/11368028)
Supplement: Supplementary file 1 [file 1]

**Supplemental Material S3.** Correlations between apprehension ratings and psychological stress, story retell accuracy, and story retell speed.

|         | Stress | Productivity | Efficiency | Rate  | Repetitions | Pauses |
|---------|--------|--------------|------------|-------|-------------|--------|
| PRCA-24 | .475** | -.266*       | -.190      | -.096 | .058        | .105   |
| Stress  | —      | -.184        | -.184      | -.230 | .033        | -.024  |

*Note.* Productivity = number of correct information units produced during the narrative; Efficiency = proportion of correct information units to words produced during the narrative; Rate = words per minute; Repetitions = repetitions per word; Pauses = number of extended and filled pauses per utterance; PRCA-24 = Personal Report of Communication Apprehension (McCroskey, Beatty, Kearney, & Plax, 1985).

\* $p < .05$ . \*\* $p < .01$ .

**Reference**

McCroskey, J. C., Beatty, M. J., Kearney, P., & Plax, T. G. (1985). The content validity of the PRCA-24 as a measure of communication apprehension across communication contexts. *Communication Quarterly*, 33(3), 165–173. <https://doi.org/10.1080/01463378509369595>
