# Supplementary material
Source: publisher figshare collection journal article supplement (https://asha.figshare.com/articles/dataset/_/11368028)
Supplement: Supplementary file 2 [file 1]

## **Supplemental Material S4. Interview guide.**

1. Let's start the discussion by talking about your overall experience during the experiment.
  - a. What was easy for you?
  - b. What was difficult for you?
  - c. What did you notice about the students who listened to your story?
2. Now, let's talk about each specific situation.
  - a. How do you think you did at telling the story to [name of socially responsive student]? What were your thoughts and feelings during this story retell? What strategies, if any, were helpful?
  - b. How do you think you did at telling the story to [name of socially unresponsive student]? What were your thoughts and feelings during this story retell? What strategies, if any, were helpful?
3. Was there anything that either student listener did that was particularly helpful/unhelpful? Why do you think these behaviors helped/did not help?

### *Probes for Discussion:*

- *Stress response and any link to speech behavior*
- *Perceived differences between telling the story during the responsive and unresponsive partner conditions*
- *Self-evaluation of story retell performance*
- *Factors that contributed to ease/challenge of story retell task*
- *Awareness of communication partner behaviors*
